# Supplementary material
Source: Research Square preprint supplement (doi:10.21203/rs.3.rs-9134617/v1)
Supplement: Supplementary file 1 [file 15cc0eb1cb0bc91b37497b7d.docx]

| Age (an open question): |
| --- |
| Gender (an open question): |
| 1. What is your overall knowledge about end-of-life care? |
| 1. Very good 2. Good 3. Average 4. Poor 5. Lack of knowledge |
| 1. What specific skills do you consider essential in the context of end-of-life care? |
| 1. Communication with the patient and family 2. Relief of pain and other symptoms 3. Psychological aspects of care, including support for the patient and family 4. Respect for the patient’s autonomy 5. Ethics and morality in end-of-life care 6. Other (please specify) |
| 1. Do you think the current curriculum provides sufficient knowledge and skills in end-of-life care? |
| 1. Yes 2. No 3. Not sure |
| 1. Which teaching methods do you consider most effective for conveying knowledge about end-of-life care? |
| 1. Lectures 2. Workshops 3. Practical training 4. Medical simulations 5. Case discussions |
| 1. Do you feel there is a need to expand the undergraduate curriculum in the area of end-of-life care? |
| 1. Yes (answer questions 7 and 8) 2. No (skip questions 7 and 8) 3. Not sure |
| 1. In your opinion, what are the main areas that should be strengthened in the undergraduate program related to end-of-life care? |
| 1. Control of pain and other somatic symptoms 2. Communication with the patient and family 3. Psychological aspects of care, including support for the patient and family 4. Respect for the patient’s autonomy 5. Ethics in palliative care 6. Other (please specify) |
| 1. What are your educational needs in the field of end-of-life care? |
| A. In the area of theoretical knowledge  B. In the area of practical skills  C. In the area of interpersonal skills |
| 1. Do you think there is sufficient availability of educational materials on end-of-life care? |
| A. Yes  B. No  C. Not sure |
| 1. Do you think there is a need to introduce additional internships related to end-of-life care? |
| 1. Yes 2. No 3. Not sure |
| 1. Do think the collaboration with palliative care facilities is necessary to gain practical knowledge? |
| 1. Yes 2. No 3. Not sure |
| 1. Do you think that skills in palliative care are important for future nursing practice? |
| 1. Yes 2. No 3. Not sure |
| 1. Do you think nursing students should have access to additional palliative care training outside the study program? |
| 1. Yes 2. No 3. Not sure |
| 1. Do you plan to work in the field of end-of-life care after graduation? |
| 1. Yes 2. No |
| 1. What motivated your decision (an open question)?  |  |  | | --- | --- | |  |  | |
| 1. Do you think that in the future, when providing care for a person at the end of life, you will: |
| 1. I would find it difficult to provide proper care. 2. I would have no difficulty in caring for a person at the end of life. 3. I have no opinion. |
